# Supplementary material for: Cesium carbonate-catalyzed synthesis of phosphorothioates via S-phosphination of thioketones
Source: Royal Society of Chemistry journal article supplement (doi:10.1039/d2cc04331a), 2022-01-01
Supplement: d2cc04331a1.pdf [file d2cc04331a1.pdf]

We have presented the graphical abstract image and text for your article below. This briefly summarises your work, and will be presented with your article online.

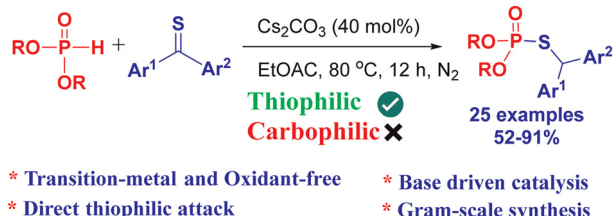

## Cesium carbonate-catalyzed synthesis of phosphorothioates via S-phosphination of thioketones

Zu-Wei Chen, Annamalai Pratheepkumar, Rekha Bai, Yongyi Hu, Satpal Singh Badsara, Kuo-Wei Huang and Chin-Fa Lee\*

A highly efficient and environmentally-friendly base-mediated transition metal-free direct thiophilic catalytic approach is reported for the synthesis of *S*-benzhydryl-phosphorothioates by reacting phosphite nucleophiles with diarylmethanethione.

Please check this proof carefully. Our staff will not read it in detail after you have returned it.

Please send your corrections either as a copy of the proof PDF with electronic notes attached or as a list of corrections. **Do not edit the text within the PDF or send a revised manuscript** as we will not be able to apply your corrections. Corrections at this stage should be minor and not involve extensive changes.

**Proof corrections must be returned as a single set of corrections, approved by all co-authors. No further corrections can be made after you have submitted your proof corrections as we will publish your article online as soon as possible after they are received.**

Please ensure that:

- The spelling and format of all author names and affiliations are checked carefully. You can check how we have identified the authors' first and last names in the researcher information table on the next page. **Names will be indexed and cited as shown on the proof, so these must be correct.**
- Any funding bodies have been acknowledged appropriately and included both in the paper and in the funder information table on the next page.
- All of the editor's queries are answered.
- Any necessary attachments, such as updated images or ESI files, are provided.

Translation errors can occur during conversion to typesetting systems so you need to read the whole proof. In particular please check tables, equations, numerical data, figures and graphics, and references carefully.

Please return your **final** corrections, where possible within **48 hours** of receipt following the instructions in the proof notification email. If you require more time, please notify us by email to [chemcomm@rsc.org](mailto:chemcomm@rsc.org).

## Funding information

Providing accurate funding information will enable us to help you comply with your funders' reporting mandates. Clear acknowledgement of funder support is an important consideration in funding evaluation and can increase your chances of securing funding in the future.

We work closely with Crossref to make your research discoverable through the Funding Data search tool (<http://search.crossref.org/funding>). Funding Data provides a reliable way to track the impact of the work that funders support. Accurate funder information will also help us (i) identify articles that are mandated to be deposited in **PubMed Central (PMC)** and deposit these on your behalf, and (ii) identify articles funded as part of the **CHORUS** initiative and display the Accepted Manuscript on our web site after an embargo period of 12 months.

Further information can be found on our webpage (<http://rsc.li/funding-info>).

### What we do with funding information

We have combined the information you gave us on submission with the information in your acknowledgements. This will help ensure the funding information is as complete as possible and matches funders listed in the Crossref Funder Registry.

If a funding organisation you included in your acknowledgements or on submission of your article is not currently listed in the registry it will not appear in the table on this page. We can only deposit data if funders are already listed in the Crossref Funder Registry, but we will pass all funding information on to Crossref so that additional funders can be included in future.

### Please check your funding information

The table below contains the information we will share with Crossref so that your article can be found *via* the Funding Data search tool. **Please check that the funder names and grant numbers in the table are correct and indicate if any changes are necessary to the Acknowledgements text.**

| Funder name                                        | Funder's main country of origin | Funder ID (for RSC use only) | Award/grant number          |
|----------------------------------------------------|---------------------------------|------------------------------|-----------------------------|
| Ministry of Science and Technology, Taiwan         | Taiwan                          | 501100004663                 | Most 110-2113-M-005-014-MY3 |
| National Chung-Hsing University                    | Taiwan                          | 501100004946                 | Unassigned                  |
| King Abdullah University of Science and Technology | Saudi Arabia                    | 501100004052                 | Unassigned                  |
| Ministry of Education                              | Taiwan                          | 100010002                    | Unassigned                  |

Q1

## Researcher information

Please check that the researcher information in the table below is correct, including the spelling and formatting of all author names, and that the authors' first, middle and last names have been correctly identified. **Names will be indexed and cited as shown on the proof, so these must be correct.**

If any authors have ORCID or ResearcherID details that are not listed below, please provide these with your proof corrections. Please ensure that the ORCID and ResearcherID details listed below have been assigned to the correct author. Authors should have their own unique ORCID iD and should not use another researcher's, as errors will delay publication.

Please also update your account on our online [manuscript submission system](#) to add your ORCID details, which will then be automatically included in all future submissions. See [here](#) for step-by-step instructions and more information on author identifiers.

| First (given) and middle name(s) | Last (family) name(s) | ResearcherID | ORCID iD            |
|----------------------------------|-----------------------|--------------|---------------------|
| Zu-Wei                           | Chen                  |              |                     |
| Annamalai                        | Pratheepkumar         |              |                     |
| Rekha                            | Bai                   |              |                     |
| Yongyi                           | Hu                    |              |                     |
| Satpal Singh                     | Badsara               | B-3436-2015  | 0000-0002-9839-5113 |
| Kuo-Wei                          | Huang                 |              | 0000-0003-1900-2658 |
| Chin-Fa                          | Lee                   |              | 0000-0003-0735-5691 |

## Queries for the attention of the authors

Journal: ChemComm

Paper: d2cc04331a

Title: Cesium carbonate-catalyzed synthesis of phosphorothioates via S-phosphination of thioketones

For your information: You can cite this article before you receive notification of the page numbers by using the following format: (authors), Chem. Commun., (year), DOI: 10.1039/d2cc04331a.

Editor's queries are marked on your proof like this **Q1**, **Q2**, etc. and for your convenience line numbers are indicated like this 5, 10, 15, ...

Please ensure that all queries are answered when returning your proof corrections so that publication of your article is not delayed.

| Query reference | Query                                                                                                                                                                                                                                                                                                                                   | Remarks |
|-----------------|-----------------------------------------------------------------------------------------------------------------------------------------------------------------------------------------------------------------------------------------------------------------------------------------------------------------------------------------|---------|
| Q1              | Funder details have been incorporated in the funder table using information provided in the article text. Please check that the funder information in the table is correct and indicate any changes, if required. If changes are required, please ensure that you also amend the Acknowledgements text as appropriate.                  |         |
| Q2              | Have all of the author names been spelled and formatted correctly? Names will be indexed and cited as shown on the proof, so these must be correct. No late corrections can be made.                                                                                                                                                    |         |
| Q3              | Please check that the inserted CCDC number is correct.                                                                                                                                                                                                                                                                                  |         |
| Q4              | Do you wish to add an e-mail address for the corresponding author? If so, please provide the relevant information.                                                                                                                                                                                                                      |         |
| Q5              | Please check that the inserted Graphical Abstract text is suitable. If you provide replacement text, please ensure that it is no longer than 250 characters (including spaces).                                                                                                                                                         |         |
| Q6              | Scheme 1 contains parts labelled (a) to (c), but these do not appear to be mentioned in the caption. Would you like to modify the caption or resupply the artwork (preferably as a TIF file at 600 dots per inch)?                                                                                                                      |         |
| Q7              | Please check that Table 2 has been displayed correctly.                                                                                                                                                                                                                                                                                 |         |
| Q8              | Scheme 3 contains parts labelled (a) to (c), but these do not appear to be mentioned in the caption. Would you like to modify the caption or resupply the artwork (preferably as a TIF file at 600 dots per inch)?                                                                                                                      |         |
| Q9              | Have all of the funders of your work been fully and accurately acknowledged?                                                                                                                                                                                                                                                            |         |
| Q10             | Please note that a conflict of interest statement is required for all manuscripts. Please read our policy on Conflicts of interest ( <a href="http://rsc.li/conflicts">http://rsc.li/conflicts</a> ) and provide a statement with your proof corrections. If no conflicts exist, please state that "There are no conflicts to declare". |         |

# Cesium carbonate-catalyzed synthesis of phosphorothioates *via* *S*-phosphination of thioketones†

Cite this: DOI: 10.1039/d2cc04331a

Received 3rd August 2022,  
Accepted 1st September 2022

DOI: 10.1039/d2cc04331a

rsc.li/chemcomm

Zu-Wei Chen,<sup>a</sup> Annamalai Pratheepkumar,<sup>a</sup> Rekha Bai,<sup>a</sup> Yongyi Hu,<sup>b</sup>  
Satpal Singh Badsara,<sup>c</sup> Kuo-Wei Huang<sup>b</sup> and Chin-Fa Lee<sup>b,\*ade</sup>

A highly efficient and environmentally-friendly base-mediated transition metal-free direct thiophilic catalytic approach is reported for the synthesis of *S*-benzhydryl-phosphorothioates by reacting phosphite nucleophiles with diaryl-methanethione. A wide variety of thioketones were coupled with different phosphite derivatives to provide the corresponding phosphorothioates in good to excellent yields. The control experiments and density functional theory (DFT) calculations rely on the regio-selective thiophilic addition of a phosphite nucleophile *via* umpolung protocols.

Organophosphorous compounds are omnipresent building blocks of various organic frameworks<sup>1</sup> and have potential applications in synthetic chemistry,<sup>2</sup> agrochemicals,<sup>3</sup> and pharmaceuticals.<sup>4</sup> Phosphorothioates are a class of organophosphorus compounds that have ubiquitous advantages in the field of pesticides,<sup>5</sup> bioactive molecules,<sup>6</sup> and materials science.<sup>7</sup> Phosphorothioate-modified oligonucleotides have shown potential applications as RNA-targeted therapeutics,<sup>8</sup> HIV-I inhibitors,<sup>9</sup> and anticholinesterase inhibitors.<sup>10</sup> The synthetic utility and pharmaceutical applications of phosphorothioates and organo-thiophosphorous compounds have always attracted the scientific community to develop synthetic methodologies for these types of compounds.<sup>11</sup> Early-stage development and traditional methods for the phosphorothioates are often hampered by the pre-functionalization of

phosphorous derivatives and various thiol surrogates, associated with harsh reaction conditions, toxicity, and moisture sensitivity.<sup>12</sup> In recent years, transition metal-catalyzed,<sup>13</sup> electrochemical synthesis,<sup>14</sup> photo-redox catalysis,<sup>15</sup> and metal-free<sup>16</sup> approaches using various phosphorous and sulfur surrogates have been developed for synthesizing phosphinothioates or phosphorothioate compounds.

Meanwhile, Brook rearrangement<sup>17</sup> and further advancements like aza-Brook,<sup>18</sup> bora-Brook,<sup>19</sup> and phospho-Brook<sup>20</sup> rearrangements were successfully employed for the synthesis of simple or complex organic molecules. In particular, thioketones are widely chosen for the synthesis of various organic frameworks due to the unique properties of the C=S bond compared to the C=O bond, such as high reactivity of the C=S bond, the larger atomic radius of the sulfur atom, strong electrophilicity, the higher HOMO orbitals, and the lower LUMO orbitals (Scheme 1a).<sup>21</sup> The pioneering studies of Beak *et al.* uncovered the reactivity pattern of thioketones and developed a synthetic protocol for the synthesis of benzhydryl phenyl sulfide from the coupling of diarylthioketone and phenyl lithium at room temperature (Scheme 1b).<sup>22</sup> Takeda *et al.* have developed a reaction between silyl thioketone and lithium diethyl phosphite at −98 °C to afford a thiophilic attacked product as a major product, whereas *S*-attacked and thia-Brook rearranged products were found as minor products (Scheme 1c).<sup>23</sup> However, these protocols showed some limitations and drawbacks such as limited substrate applicability, safety issues, and harsh reaction conditions required for the completion of the reactions. For the above-mentioned reasons, an environmentally friendly, atom-economical, and mild reaction condition protocol for the preparation of phosphorothioates is still desired in this field. In our endeavor to develop efficient synthetic methodologies for the organo-thiophosphorous compounds,<sup>14,24</sup> herein, we disclose a novel, regioselective, and efficient catalytic protocol for the synthesis of *S*-benzhydryl phosphorothioates *via* direct thiophilic attack of phosphite nucleophiles, which afforded a broad spectrum of phosphorothioate compounds.

<sup>a</sup> Department of Chemistry, National Chung Hsing University, Taichung, Taiwan, 402, Republic of China

<sup>b</sup> KAUST Catalysis Center and Division of Physical Science and Engineering, King Abdullah University of Science and Technology, Thuwal, 23955, Saudi Arabia

<sup>c</sup> MFOS Laboratory, Department of Chemistry, University of Rajasthan, JLN Marg, Jaipur, Rajasthan, 302004, India

<sup>d</sup> i-Center for Advanced Science and Technology (iCAST), National Chung Hsing University, Taichung City, 402, Taiwan, Republic of China

<sup>e</sup> Innovation and Development Center of Sustainable Agriculture (IDCSA), National Chung Hsing University, Taichung City, 402, Taiwan, Republic of China

† Electronic supplementary information (ESI) available. CCDC 2183574. For ESI and crystallographic data in CIF or other electronic format see DOI: <https://doi.org/10.1039/d2cc04331a>

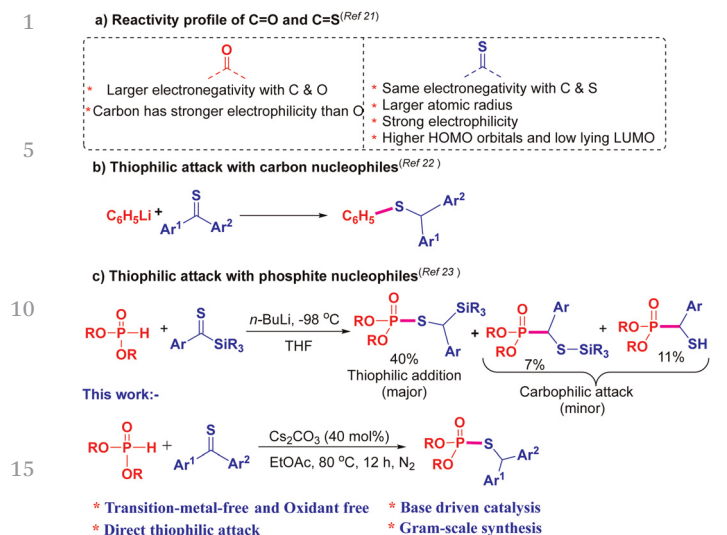

**Scheme 1** Synthetic utilization of thioketones and phosphorous nucleophiles.

In our initial investigations, a reaction was carried out with commercially available diethyl phosphites (**1a**) and diphenylmethanethione (**2a**) in the presence of Et<sub>3</sub>N (40 mol%) in ethyl acetate at 80 °C for 12 h, which underwent thiophilic *S*-attack to afford the desired phosphorothioate **3a** in a 64% isolated yield (Table 1, entry 1). A reaction without a base did not give the desired product, which emphasizes the catalytic role of the base (Table 1, entry 2). Only a trace amount of **3a** was detected when nucleophilic base DABCO was used instead of triethylamine (Table 1, entry 3). The other non-nucleophilic bases such as

**Table 1** Optimization of the reaction conditions<sup>a</sup>

| Entry            | Base                            | Solvent     | Temp (°C) | Time (h) | Yield <sup>b</sup> (%) |
|------------------|---------------------------------|-------------|-----------|----------|------------------------|
| 1.               | Et <sub>3</sub> N               | EtOAc       | 80        | 12       | 64                     |
| 2.               | —                               | EtOAc       | 80        | 12       | N.R.                   |
| 3.               | DABCO                           | EtOAc       | 80        | 12       | Trace                  |
| 4.               | CsF                             | EtOAc       | 80        | 12       | 39                     |
| 5.               | K <sub>2</sub> CO <sub>3</sub>  | EtOAc       | 80        | 12       | 48                     |
| 6.               | Na <sub>2</sub> CO <sub>3</sub> | EtOAc       | 80        | 12       | 43                     |
| 7.               | Cs <sub>2</sub> CO <sub>3</sub> | EtOAc       | 80        | 12       | 86                     |
| 8.               | Cs <sub>2</sub> CO <sub>3</sub> | EtOAc       | 80        | 6        | 45                     |
| 9.               | Cs <sub>2</sub> CO <sub>3</sub> | EtOAc       | 80        | 18       | 83                     |
| 10.              | Cs <sub>2</sub> CO <sub>3</sub> | EtOAc       | 100       | 12       | 84                     |
| 11.              | Cs <sub>2</sub> CO <sub>3</sub> | DMF         | 80        | 12       | 25                     |
| 12.              | Cs <sub>2</sub> CO <sub>3</sub> | 1,4-Dioxane | 80        | 12       | 68                     |
| 13.              | Cs <sub>2</sub> CO <sub>3</sub> | Toluene     | 80        | 12       | 85                     |
| 14.              | Cs <sub>2</sub> CO <sub>3</sub> | EtOH        | 80        | 12       | 71                     |
| 15. <sup>c</sup> | Cs <sub>2</sub> CO <sub>3</sub> | EtOAc       | 80        | 12       | 84                     |
| 16. <sup>d</sup> | Cs <sub>2</sub> CO <sub>3</sub> | EtOAc       | 80        | 12       | 42                     |
| 17. <sup>e</sup> | Cs <sub>2</sub> CO <sub>3</sub> | EtOAc       | 80        | 12       | 38                     |

<sup>a</sup> Reaction conditions: diethyl phosphites (**1a**) (0.3 mmol), diphenylthioketone (**2a**) (0.45 mmol), base (40 mol%), and solvent (2.0 mL) under a N<sub>2</sub> atmosphere. <sup>b</sup> Isolated yield based on **1a**. <sup>c</sup> 50 mol% Cs<sub>2</sub>CO<sub>3</sub> was used. <sup>d</sup> 30 mol% Cs<sub>2</sub>CO<sub>3</sub> was used. <sup>e</sup> 20 mol% Cs<sub>2</sub>CO<sub>3</sub> was used.

CsF, K<sub>2</sub>CO<sub>3</sub>, and Na<sub>2</sub>CO<sub>3</sub> gave moderate yields of **3a** (39–48%) (Table 1, entries 4–6). Gratifyingly, cesium carbonate increased the reactivity and provided *S*-benzhydryl phosphorothioate **3a** in an 86% yield (Table 1, entry 7). Both, reducing and increasing the time of the reaction diminished the yield of **3a** (Table 1, entries 8 and 9).

For further enhancement in the yield, the temperature and solvents were also screened. Increasing the reaction temperature up to 100 °C did not notably affect the product yield (Table 1, entry 10). In the toluene solvent system, product **3a** was observed in an 85% yield, whereas other solvent systems (DMF, 1,4-dioxane, and EtOH) were not found to be superior to ethyl acetate (Table 1, entries 11–14). It is worth mentioning here that increasing the amount of Cs<sub>2</sub>CO<sub>3</sub> from 40 mol% to 50 mol% provided similar results (Table 1, entry 15), whereas decreasing the amount of Cs<sub>2</sub>CO<sub>3</sub> gave inferior results (Table 1, entries 16 and 17).

With the robust conditions in hand, to check the generality of the developed protocol, various thiophilic *S*-attack-mediated phosphorothioates **3a–y** were synthesized in 52–91% yields (Table 2). Phosphites **1a–d** contained different substituents (Et, <sup>i</sup>Pr, <sup>i</sup>Bu, and <sup>n</sup>Bu) coupled with diaryl thioketone **2a**, which gave the corresponding *S*-benzhydryl phosphorothioates **3a–d** in 75–88% yields.

Thioketone **2b** possessing electron-donating groups (EDGs) coupled with phosphites **1a–d** providing the corresponding phosphorothioates **3e–h** in 67–82% yields. The halogen (F, Cl, and Br)-containing diaryl thioketones smoothly reacted with different phosphite nucleophiles under the optimized reaction conditions and afforded the corresponding phosphorothioates **3i–v** in 52–91% yields. Phenyl(*p*-fluoro)methanethione **2c** coupled well with phosphites **1a–d** to provide the phosphorothioate products **3i–l** in 68–91% yields. Similarly, *p*-(chloro and bromo)-substituted diaryl thioketones **2d** and **e** showed efficient reactivity towards various phosphites **1a–d** for the synthesis of phosphorothioate compounds **3m–3r** in 52–85% yields. Notably, sterically hindered phenyl(*o*-chloro) methanethione substrate **2f** also reacted well with various phosphites **1a–d** and gave the corresponding phosphorothioates **3s–v** in 74–87% yields. Thioketone 9*H*-fluorene-9-thione **2g** also showed good reactivity with phosphites **1a–1c** to give the phosphorothioates **3w–y** in 76–84% yields. Compounds **3a–y** were all well characterized by <sup>1</sup>H and <sup>13</sup>C NMR spectral data and HRMS data, and the structure of compound **3p** was further confirmed by single-crystal data analysis.<sup>25</sup> However, thioketones, 1-phenylethane-1-thione (**2h**), benzothioamide (**2i**), *O*-methyl benzothiate (**2j**) and 2*H*-chromene-2-thione (**2k**) (Fig. 1) could not undergo the *S*-phosphination process under the standard reaction conditions.

To demonstrate the practicability and synthetic applicability of the developed protocol, a gram-scale experiment was performed *via* the reaction between **1a** and **2a** following the standard conditions, which afforded product **3a** in 81% (1.37 g) isolated yield (Scheme 2).

To gain insight about the reaction pathway of the developed regioselective P–S bond synthesis protocol, we carried out some

Q7 Table 2 Substrate scope of phosphonates and thioketones<sup>a</sup>

5

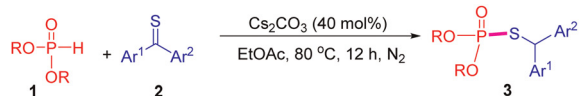

10

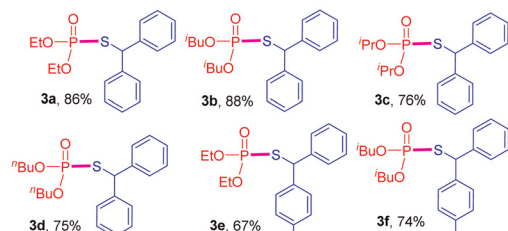

15

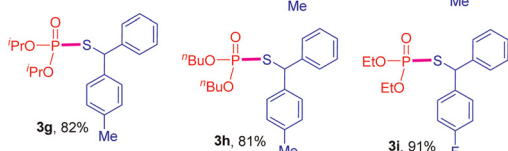

20

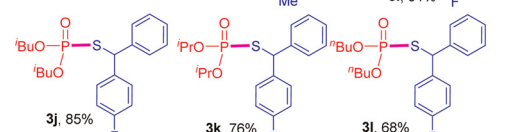

25

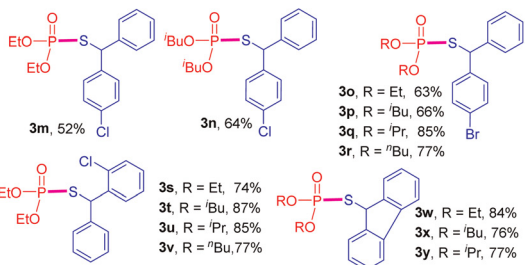

30

<sup>a</sup> Reaction conditions: phosphites **1** (0.3 mmol), thioketones **2** (0.45 mmol),  $\text{Cs}_2\text{CO}_3$  (40 mol%), and ethyl acetate (2 mL) under  $\text{N}_2$  at 80 °C for 12 h. Isolated yields based on **1**.

35

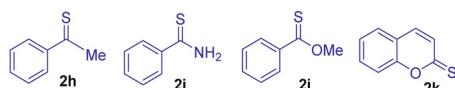

40

Fig. 1 Unsuccessful substrates.

45

control experiments with different substrates (Scheme 3). A competitive experiment between benzophenone (**2aa**) and diphenylmethanethione (**2a**) with diethyl phosphonate (**1a**) was carried out to check the product selectivity and feasibility. Interestingly, it regioselectively gave rise to phosphorothioates **3a** in 69% isolated yield without the detection of **4a**

50

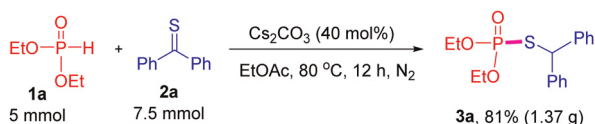

55

Scheme 2 Gram-scale synthesis.

## a) Competitive experiment

1

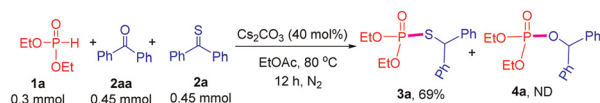

5

## b) Anionic trapping experiment with benzyl bromide

10

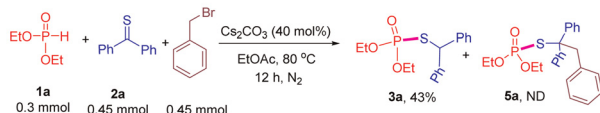

## c) Radical trapping experiment

15

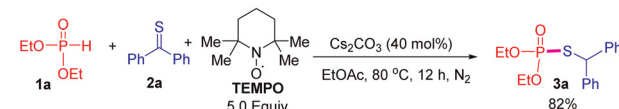

Scheme 3 Control experiments.

Q8

(Scheme 3a). Subsequently, an anionic trapping experiment with the use of benzyl bromide was performed and it gave rise to product **3a** without the detection of any benzyl bromide coupled product **5a** (Scheme 3b). Furthermore, the reaction between **1a** and **2a** in the presence of 5.0 equiv of TEMPO (2,2,6,6-tetramethylpiperidine-1-oxyl; a radical scavenger) provided the desired product **3a** in 82% yield (Scheme 3c). This radical trapping experiment ruled out the possible radical pathway for this *S*-phosphination protocol.

Based on the above-mentioned observations, the literature and supported by density functional theory (DFT) calculations (see ESI<sup>†</sup>), a plausible reaction mechanism was proposed by taking **1a** and **2a** as model substrates (Fig. 2). Initially, phosphite **1a** interacts with  $\text{Cs}_2\text{CO}_3$  and transforms into cesium-stabilized phosphite anion **I** with the formation of  $\text{CsHCO}_3$ . Anion **I** further undergoes thiophilic addition onto thioketone **2a** via kinetically favorable transition state **TS<sub>S</sub>** to give the carbanion species, intermediate **II**. Upon protonation, *S*-benzhydryl phosphorothioate **3a** can be formed. The regenerated  $\text{Cs}_2\text{CO}_3$  again participates in the catalytic cycle.

In conclusion, for the first time, we have developed a practically-scalable, efficient and environment-friendly base-mediated, transition metal-free and oxidant-free direct thiophilic catalytic approach for the synthesis of *S*-benzhydryl phosphorothioates. This conventional base-assisted protocol was found to be useful for the synthesis of a wide variety of phosphorothioates by employing a variety of thioketones with phosphite derivatives containing electron-donating as well as electron-withdrawing groups in good yields. The control experiments and density functional theory (DFT) calculations rely on the regioselective thiophilic addition of a phosphite nucleophile via umpolung protocols.

This work was financially supported by the Ministry of Science and Technology, Taiwan (Most 110-2113-M-005-014-MY3), National Chung Hsing University, i-Center for Advanced Science and Technology (iCAST), the "Innovation and

Q9

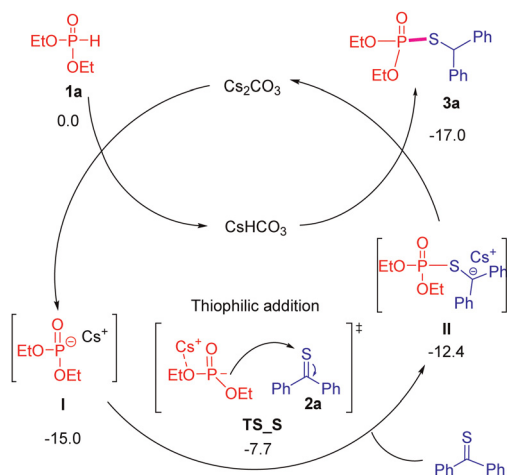

Fig. 2 Plausible reaction mechanism with single point energies under B3LYP(IEFPCM, EA)/6-31 + +G(d,p)/SDD || B3LYP/6-31G(d)/SDD in kcal mol<sup>-1</sup>.

Development Centre of Sustainable Agriculture (IDCSA)'' of The Featured Areas Research Centre Program within the framework of the Higher Education Sprout Project by the Ministry of Education (MOE) in Taiwan and Science and Engineering Research Board-Department of Science. We are also grateful to the service of NOOR 2, Shaheen 2 High Performance Computing Facilities, and financial support from King Abdullah University of Science and Technology (KAUST).

## Conflicts of interest

■■■■■

## Notes and references

- (a) T. Imamoto and R. Engel, *Handbook of organophosphorus chemistry*, New York, 1992, pp. 5–8; (b) L. D. A. Quin, *A guide to organophosphorus chemistry*, New York, 2000.
- (a) T. Steinbach and F. R. Wurm, *Angew. Chem., Int. Ed.*, 2015, **54**, 6098–6108; (b) M. A. Shameem and A. Orthaber, *Chem. – Eur. J.*, 2016, **22**, 10718–10753.
- M. A. Gallo and N. J. Lawryk, *Handbook of pesticide toxicology*, 1991, vol. 2, pp. 917–1123.
- (a) U. Pradere, E. C. Garnier-Amblard, S. J. Coats, F. Amblard and R. F. Schinazi, *Chem. Rev.*, 2014, **114**, 9154–9218; (b) C. Schultz, *Bioorg. Med. Chem.*, 2003, **11**, 885–898.
- (a) N. N. Melnikov, *Chemistry of pesticides*, ed., F. A. Gunther and J. D. Gunther, Springer, New York, 2012; (b) F. E. Khasawneh,

- E. C. Sample and E. J. Kamprath, *The Role of phosphorus in agriculture*, American Society of Agronomy: WI, Madison, 1980.
- (a) F. Eckstein, *Nucleic Acids Res.*, 2014, **24**, 374–387; (b) S. T. Crooke, T. A. Vickers and X.-H. Liang, *Nucleic Acids Res.*, 2020, **48**, 5235–5253; (c) T. S. Kumar, T. Yang, S. Mishra, C. Cronin, S. Chakraborty, J.-B. Shen, B. T. Liang and K.-A. Jacobson, *J. Med. Chem.*, 2013, **56**, 902–914.
- K. A. Mazzio, K. Okamoto, Z. Li, S. Gutmann, E. Strein, E. D.-S. Ginger, R. Schlaf and K. C. A. Luscombe, *Chem. Commun.*, 2013, **49**, 1321–1323.
- N.-S. Li, J. K. Frederiksen and J. A. Piccirilli, *Acc. Chem. Res.*, 2011, **44**, 1257–1269.
- H. Hotoda, M. Koizumi, R. Koga, M. Kaneko, K. Momota, T. Ohmine, H. Furukawa, T. Agatsuma, T. Nishigaki, J. Sone, S. Tsutsumi, T. Kosaka, K. Abe, S. Kimura and K. Shimada, *J. Med. Chem.*, 1998, **41**, 3655–3663.
- R. Xie, Q. Zhao, T. Zhang, J. Fang, X. Mei, J. Ning and Y. Tang, *Bioorg. Med. Chem.*, 2013, **21**, 278–282.
- D. J. Jones, E. M. O'Leary and T. P. O'Sullivan, *Adv. Synth. Catal.*, 2020, **362**, 2801–2846.
- (a) L. Zhang, P. Zhang, X. Li, J. Xu, G. Tang and Y. Zhao, *J. Org. Chem.*, 2016, **81**, 5588–5594; (b) S. Kovács, B. Bayarmagnai, A. Aillerie and L. J. Gooßen, *Adv. Synth. Catal.*, 2018, **360**, 1913–1918; (c) G. Kumaraswamy and R. Raju, *Adv. Synth. Catal.*, 2014, **356**, 2591–2598; (d) J. Bai, X. Cui, H. Wang and Y. Wu, *Chem. Commun.*, 2014, **50**, 8860–8863.
- Y. Zhu, T. Chen, S. Li, S. Shimada and L. B. Han, *J. Am. Chem. Soc.*, 2016, **138**, 5825–5828.
- C.-Y. Li, Y.-C. Liu, Y.-X. Li, D.-M. Reddy and C.-F. Lee, *Org. Lett.*, 2019, **21**, 7833–7836.
- (a) J. Xu, L. Zhang, X. Li, Y. Gao, G. Tang and Y. Zhao, *Org. Lett.*, 2016, **18**, 1266–1269; (b) H. Zhang, Z. Zhan, Y. Lin, Y. Shi, G. Li, Q. Wang, Y. Deng, L. Hai and Y. Wu, *Org. Chem. Front.*, 2018, **5**, 1416–1422.
- S. Song, Y. Zhang, A. Yeerlan, B. Zhu, J. Liu and N. Jiao, *Angew. Chem., Int. Ed.*, 2017, **129**, 2527–2531.
- (a) A. G. Brook, *J. Am. Chem. Soc.*, 1958, **80**, 1886–1889; (b) A. G. Brook, *Acc. Chem. Res.*, 1974, **7**, 77–84.
- (a) T. Honda and M. Mori, *J. Org. Chem.*, 1996, **61**, 1196–1197; (b) Y. K. Jeon and W. S. Kim, *Org. Lett.*, 2021, **23**, 7545–7549.
- S. Wang, N. Lokesh, J. Hioe, R. M. Gschwind and B. König, *Chem. Sci.*, 2019, **10**, 4580–4587.
- (a) L. El Kaïm, L. Gaultier, L. Grimaud and A. Dos Santos, *Synlett*, 2005, 2335–2336; (b) M. Hayashi and S. Nakamura, *Angew. Chem., Int. Ed.*, 2011, **50**, 2249–2252; (c) A. Kondoh and M. Terada, *Org. Lett.*, 2013, **15**, 4568–4571; (d) A. Kondoh, T. Aoki and M. Terada, *Org. Lett.*, 2014, **16**, 3528–3531.
- T. Murai, *Top. Curr. Chem.*, 2018, **376**, 1–21.
- (a) P. Beak and J. W. Worley, *J. Am. Chem. Soc.*, 1972, **94**, 597–604; (b) P. Beak, J. Yamamoto and C. J. Upton, *J. Org. Chem.*, 1975, **40**, 3052–3062.
- K. Takeda, K. Sumi and S. Hagiwara, *J. Organomet. Chem.*, 2000, **611**, 449–454.
- Y.-C. Liu and C.-F. Lee, *Green Chem.*, 2014, **16**, 357–364.
- CCDC-2183574 (3p) contains the supplementary crystallographic data for this paper. These data can be obtained free of charge from The Cambridge Crystallographic Data Centre via [www.ccdc.cam.ac.uk/data\\_request/cif](http://www.ccdc.cam.ac.uk/data_request/cif).
